# Supplementary material for: Electrogelated drug-embedded silk/gelatin/rGO degradable electrode for anti-inflammatory applications in brain-implant systems
Source: Royal Society of Chemistry journal article supplement (doi:10.1039/d3tb02715e), 2024-01-01
Supplement: d3tb02715e1.pdf [file d3tb02715e1.pdf]

## Supporting Information

### Electrogelated drug-embedded Silk/Gelatin/rGO Degradable Electrode for Nerve Anti-inflammatory Applications

Zhen-Kai Lin<sup>a,1</sup>, Jing-Syu Lin<sup>a,1</sup>, Zih-Huei Chen<sup>a</sup>, Hung-Wei Cheng<sup>a,\*</sup>, Wei-Chen  
Huang<sup>b,\*</sup> and San-Yuan Chen<sup>a,c,d,\*</sup>

\*Corresponding authors

<sup>a</sup> Department of Materials Science and Engineering, National Yang Ming Chiao Tung University, Hsinchu 300093, Taiwan.

Email: [sanyuanchen@nycu.edu.tw](mailto:sanyuanchen@nycu.edu.tw) (S.Y. Chen)  
[mlb14756@gmail.com](mailto:mlb14756@gmail.com) (H.W. Cheng)

<sup>b</sup> Department of Electrical and Computer Engineering, National Yang Ming Chiao Tung University, Hsinchu 300093, Taiwan.

Email: [weichenh@nycu.edu.tw](mailto:weichenh@nycu.edu.tw)

<sup>c</sup> Graduate Institute of Biomedical Science, China Medical University, Taichung, Taiwan

<sup>d</sup> School of Dentistry, College of Dental Medicine, Kaohsiung Medical University, Kaohsiung, Taiwan

<sup>1</sup> These authors contributed equally.

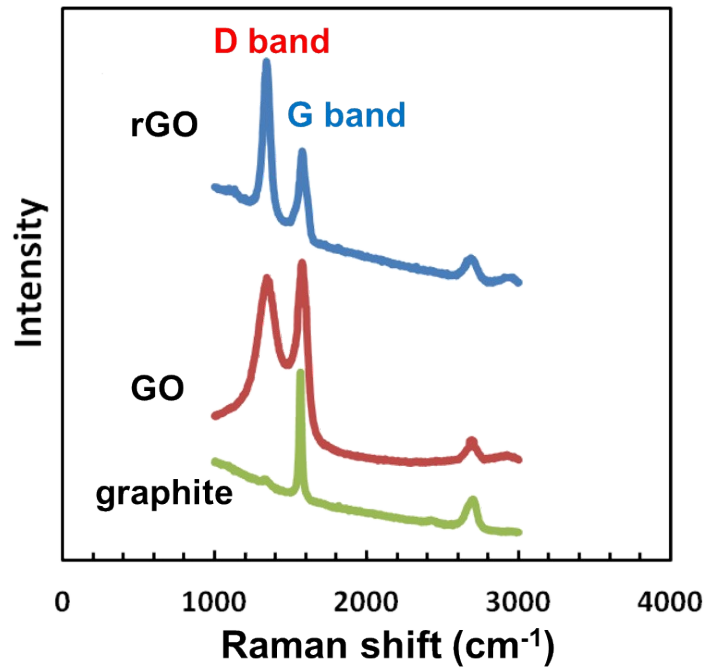

**Figure S1.** Raman spectra of graphite, GO and the rGO.

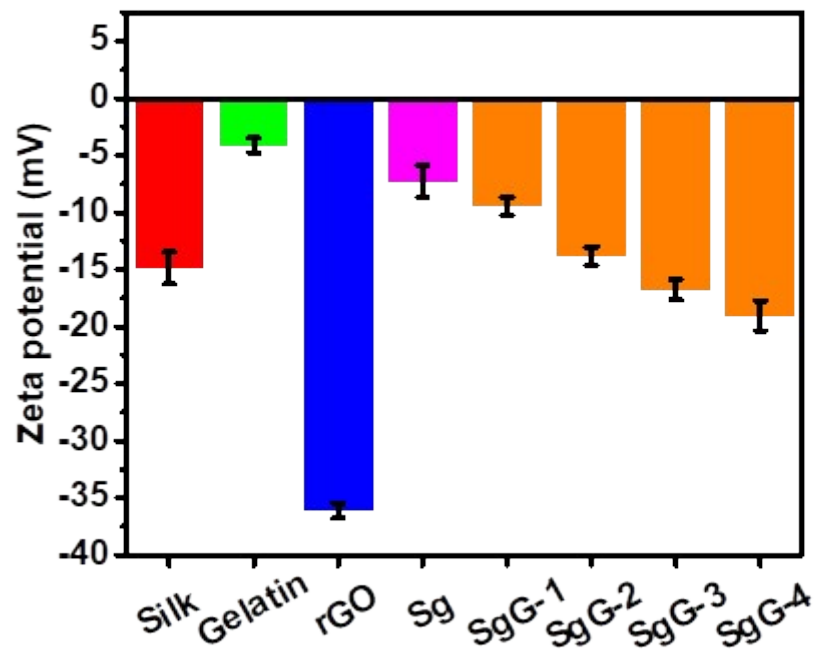

**Figure S2.** Zeta potentials of silk, gelatin, rGO, silk/gelatin (Sg) and different mass ratio of silk/gelatin/rGO (SgG) composite at pH=10.

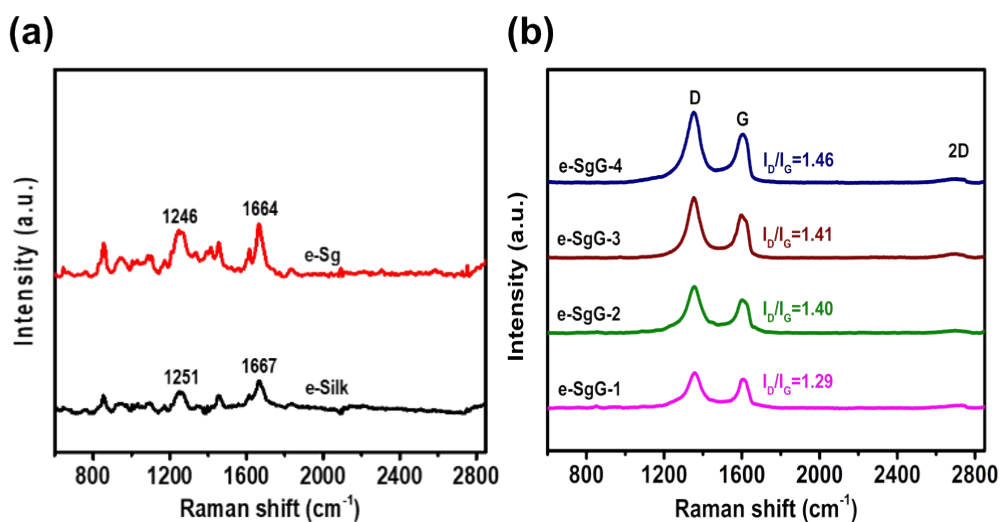

Figure S3. Raman spectra of (a) e-silk film, and silk/gelatin (e-Sg) film obtained through electrogelation, and (b) SgG films with different mass ratio of silk/gelatin/rGO through electrogelation.

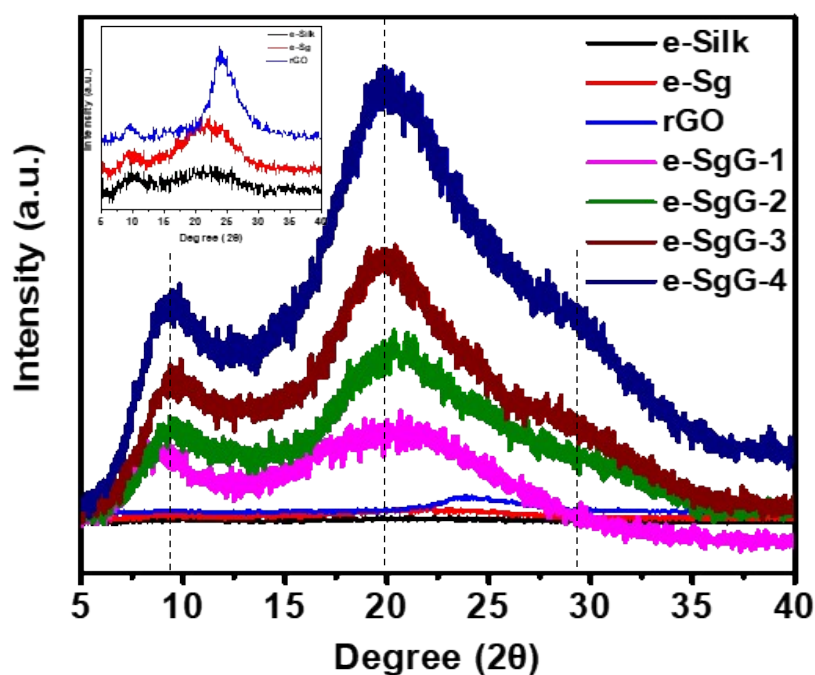

Figure S4. XRD patterns of silk film, silk/gelatin (Sg) film, silk/gelatin/rGO (SgG) films (e-SgG-1, e-SgG-2, e-SgG-3, e-SgG-4) obtained through electrogelation and reduced graphene oxide.

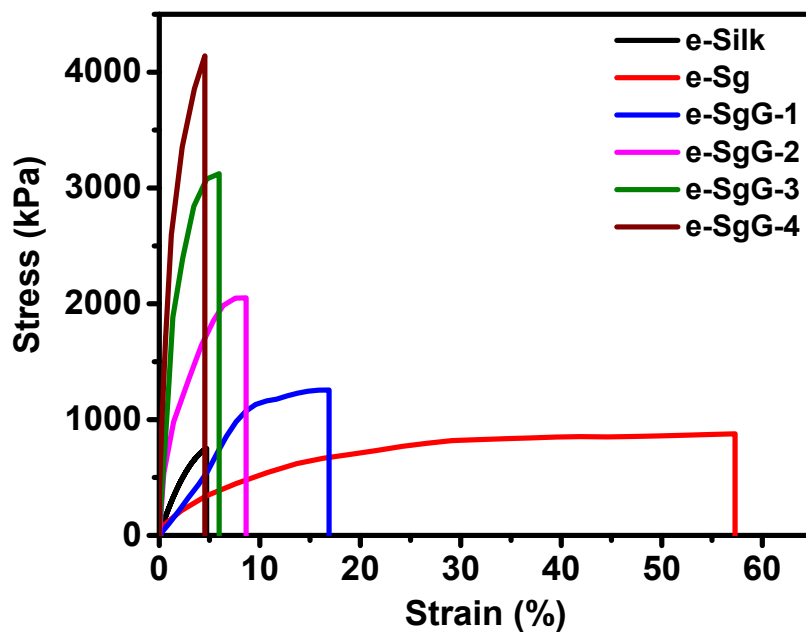

**Figure S5.** Stress-strain curves of e-Silk film, e-Sg film and e-SgG films at dry state.

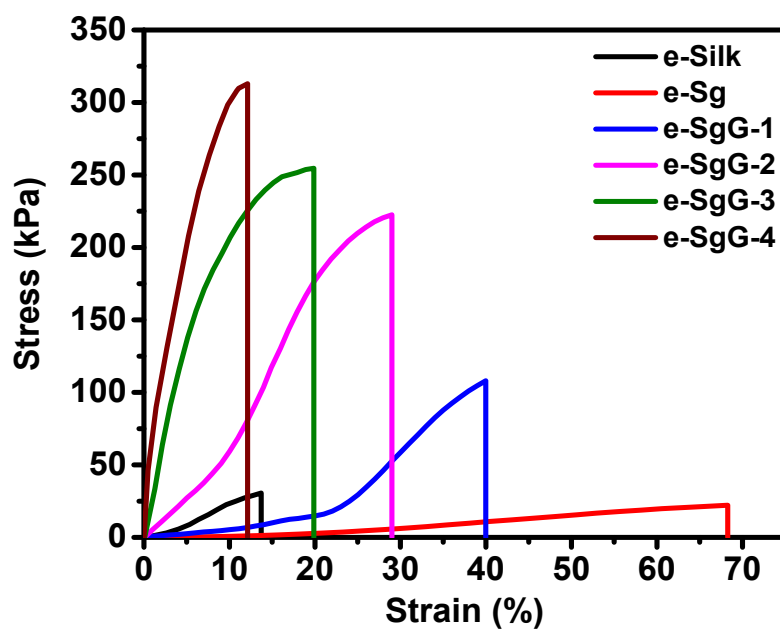

**Figure S6.** Stress-strain curves of e-Silk film, e-Sg film and e-SgG films after immersed in PBS for 40 min to achieve equilibrium swelling state.

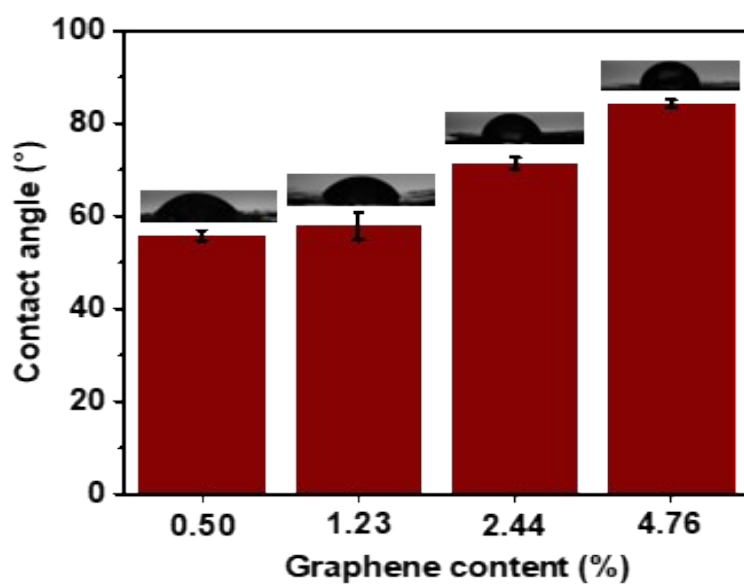

**Figure S7.** The contact angles of the e-SgG films with increasing rGO content (0.50 %, 1.23 %, 2.44 %, 4.76 %).

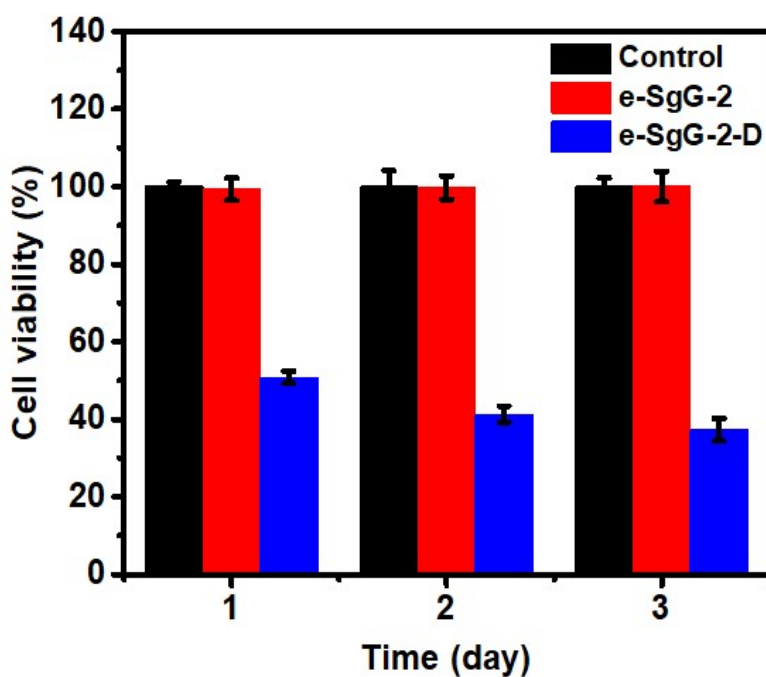

**Figure S8.** Cell viability of CTXTNA2 cells after one-day, two-day, and three-day incubation with e-SgG-2 and e-SgG-2-D films.
